# Supplementary material for: Representing glycophenotypes: semantic unification of glycobiology resources for disease discovery
Source: Database (Oxford). 2019 Nov 18;2019:baz114. doi: 10.1093/database/baz114 (PMC6859258; doi:10.1093/database/baz114)
Supplement: Supplemental-Table1_baz114 [file supplemental-table1_baz114.xlsx]

## Sheet: Supplemental Table 1
List of genetic diseases related to glycans based on curated literature
Disease Name	Mondo label	Mondo identifier	Gene identifier (HGNC)	Glycan abnormalities/affected glycosylation process	References
NOR polyagglutination syndrome	N/A	N/A	A4GALT	Abnormal glycolipids (NOR)	PMID: 11504714
Aspartylglucosaminuria	Aspartylglucosaminuria	MONDO:0008830	AGA	Glycoprotein degradation	PMID: 27906067
ALG1-CDG	ALG1-CDG	MONDO:0012052	ALG1	N-glycan synthesis	PMID: 14709599
ALG11-CDG	ALG11-CDG	MONDO:0013349	ALG11	N-glycan synthesis	PMID: 20080937
ALG12-CDG	ALG12-CDG	MONDO:0011783	ALG12	N-glycan synthesis	PMID: 11983712
ALG13-CDG	ALG13-CDG	MONDO:0010472	ALG13	N-glycan synthesis	PMID: 22492991
ALG14-CMS	Congenital myasthenic syndrome 1	MONDO:0014542	ALG14	N-glycan synthesis	PMID: 23404334
ALG2-CDG	ALG2-CDG	MONDO:0011933	ALG2	N-glycan synthesis	PMID: 12684507
ALG3-CDG	ALG3-CDG	MONDO:0010998	ALG3	N-glycan synthesis	PMID: 10581255
ALG6-CDG	Congenital disorder of glycosylation type 1C	MONDO:0011291	ALG6	N-glycan synthesis	PMID: 10359825
ALG8-CDG	ALG8-CDG	MONDO:0011969	ALG8	N-glycan synthesis	PMID: 12480927
ALG9-CDG	ALG9-CDG	MONDO:0012117	ALG9	N-glycan synthesis	PMID: 15148656
SRMMD	short stature, rhizomelic, with microcephaly, micrognathia, and developmental delay	MONDO:0014948	ARCN1	Abnormal serum transferrin glycosylation	PMID: 31075182
Metachromatic leukodystrophy	Metachromatic Leukodystrophy	MONDO:0018868	ARSA	Glycolipids degradation	PMID: 29111560
Mucopolysaccharidosis VI	Mucopolysaccharidosis Type 6	MONDO:0009661	ARSB	Glycolipids degradation	PMID: 20385007
Farber Lipogranulomatosis	Farber Lipogranulomatosis	MONDO:0009218	ASAH1	Glycolipids degradation	PMID: 30029679
ATP6AP1-CDG	Immunodeficiency 47	MONDO:0010504	ATP6AP1	Abnormal O-glycans and N-glycans	PMID: 27231034
ATP6AP2-CDG	Syndromic X-Linked Intellectual Disability Hedera Type	MONDO:0010319	ATP6AP2	Abnormal N-glycans	PMID: 29127204
ATP6V1A-CDG	Autosomal Recessive Cutis Laxa Type 2D	MONDO:0027451	ATP6V1A	Abnormal O-glycans and N-glycans	PMID: 28065471
ATP6V1E1-CDG	Autosomal Recessive Cutis Laxa Type 2C	MONDO:0027462	ATP6V1E1	Abnormal O-glycans and N-glycans	PMID: 28065471
ATP6VOA2-CDG	Autosomal Recessive Cutis Laxa Type 2A	MONDO:0018163	ATP6V0A2	Abnormal O-glycans and N-glycans	PMID: 18157129
B3GALNT2-CDG	Muscular Dystrophy-Dystroglycanopathy (Congenital With Brain And Eye Anomalies), Type A, 11	MONDO:0014071	B3GALNT2	Hypoglycosylation of α-Dystroglycan	PMID: 23453667
Spondyloepimetaphyseal dysplasia, Pakistani type	Spondyloepimetaphyseal Dysplasia, Pakistani Type	MONDO:0013019	B3GALT6	Decreased chondroitin sulfate and heparin/heparan sulfate chains	PMID: 23664117
B3GAT3-CDG	Larsen-like syndrome, B3GAT3 type	MONDO:0009511	B3GAT3	Decreased levels of dermatan sulfate	PMID: 21763480
B3GLCT-CDG	Peters plus syndrome	MONDO:0009856	B3GLCT	ER quality-control of thrombospondin type 1 repeats through O-glucose	PMID: 25544610
B4GALNT1-CDG	Hereditary spastic paraplegia 26	MONDO:0012213	B4GALNT1	Abnormal glycolipids metabolism	PMID: 23746551
B4GALT1-CDG	B4GALT1-CDG	MONDO:0011772	B4GALT1	Abnormal N-glycans	PMID: 11901181
B4GALT7-CDG	Ehlers-Danlos syndrome progeroid type	MONDO:0007526	B4GALT7	Abnormal glycosaminoglycans	PMID: 2106134
B4GAT1-CDG	Muscular dystrophy-dystroglycanopathy (congenital with brain and eye anomalies), type A13	MONDO:0014120	B4GAT1	Abnormal alpha-dystroglycan glycosylation	PMID: 23359570
Tn polyagglutination syndrome, somatic	Tn Polyagglutination syndrome	MONDO:0010381	C1GALT1C1	Abnormal O-glycans	PMID: 16251947
CAD-CDG	CAD-CDG	MONDO:0014647	CAD	Reduced level of nucleotide-sugars (UDP-glucose, UDP-GlcNac)	PMID: 28007989
Desbuquois dysplasia 1	Desbuquois dysplasia 1	MONDO:0009629	CANT1	Abnormal glycosaminoglycans	PMID: 22539336
CCDC115-CDG	CCDC115-CDG	MONDO:0014789	CCDC115	Abnormal O-glycans and N-Glycans	PMID: 29759592
Ehlers-Danlos syndrome, musculocontractural type	Ehlers-Danlos syndrome, musculocontractural type	MONDO:0011142	CHST14	Abnormal dermatan sulfate	PMID: 28238810
CHST3-CDG	Spondyloepiphyseal dysplasia with congenital joint dislocations	MONDO:0007738	CHST3	Abnormal chondroitin sulfate	PMID: 15215498
Macular corneal dystrophy	Macular corneal dystrophy	MONDO:0009020	CHST6	Abnormal keratan sulphate	PMID: 11017086
Temtamy preaxial brachydactyly syndrome	Temtamy preaxial brachydactyly syndrome	MONDO:0011533	CHSY1	Abnormal chondroitin sulfate	PMID: 21129727
COG1-CDG	COG1-CDG	MONDO:0012637	COG1	Abnormal O-glycans and N-glycans	PMID: 16537452
COG2-CDG	Congenital disorder of glycosylation, type IIq	MONDO:0054559	COG2	Abnormal O-glycans and N-glycans	PMID: 24784932
COG4-CDG	COG4-CDG	MONDO:0013281	COG4	Abnormal sialylation on N-glycans	PMID: 19494034
COG5-CDG	COG5-CDG	MONDO:0013325	COG5	Undersialylation of N- and O-glycans	PMID: 19690088
COG6-CDG	COG6-CGD	MONDO:0013810	COG6	Abnormal O-glycans and N-glycans	PMID: 20605848
COG7-CDG	COG7-CDG	MONDO:0012118	COG7	Abnormal O-glycans and N-glycans	PMID: 15107842
COG8-CDG	COG8-CDG	MONDO:0012635	COG8	Undersialylation of N- and O-glycans	PMID: 17331980
CSGALNACT1 deficiency, Desbuquois dysplasia associated with CSGALNACT1	N/A	N/A	CSGALNACT1	Reduced GalNAc-transferase activity	PMID: 27599773
Galactosialidosis	Galactosialidosis	MONDO:0009737	CTSA	Abnormal accumulation of sialylated oligosaccharides and glycopeptides	PMID: 31044084
DDOST-CDG	DDOST-CDG	MONDO:0013789	DDOST	Abnormal N-glycans	PMID: 22305527
DHDDS retinitis pigmentosa	Retinitis pigmentosa 59	MONDO:0013468	DHDDS	Abnormal N-glycans	PMID: 27343064
DOLK-CDG	Congenital disorder of glycosylation type I	MONDO:0012556	DOLK	Abnormal sialylation on N-glycans	PMID: 17273964
DPAGT1-CDG	DPAGT1-CDG	MONDO:0011964	DPAGT1	Abnormal sialylation on N-glycans	PMID: 12872255
DPM1-CDG	Congenital disorder of glycosylation type 1E	MONDO:0012123	DPM1	Abnormal N-glycans	PMID: 23856421
DMP2-CDG	Congenital muscular dystrophy with intellectual disability and severe epilepsy	MONDO:0014023	DPM2	Abnormal N-glycans	PMID: 23109149
DPM3-CDG	DPM3-CDG	MONDO:0013049	DPM3	Abnormal N-glycans	PMID: 19576565
DSE Ehlers-Danlos syndrome	Ehlers-Danlos syndrome, musculocontractural type 2	MONDO:0014236	DSE	Abnormal dermatan sulfate	PMID: 23704329
EOGT Adams-Oliver syndrome	Adams-Oliver syndrome 4	MONDO:0014124	EOGT	Abnormal O-GlcNAcylation	PMID: 25488668
EXT1/EXT2-CDG	Hereditary multiple osteochondromas	MONDO:0005508	EXT1	Abnormal glycosaminoglycans	PMID: 7550340
EXT1/EXT2-CDG	Hereditary multiple osteochondromas	MONDO:0005508	EXT2	Abnormal glycosaminoglycans	PMID: 7550340
Immunoskeletal dysplasia with neurodevelopmental abnormalities	Immunoskeletal Dysplasia With Neurodevelopmental Abnormalities	MONDO:0044312	EXTL3	Abnormal glycosaminoglycans	PMID: 28132690
	Cockayne syndrome type 2	MONDO:0019570	ERCC6	Abnormal urinary fucosylated glycans	PMID: 25251875
Muscular dystrophy, congenital, type 1C	Muscular Dystrophy-Dystroglycanopathy Type B5	MONDO:0011688	FKRP	Abnormal glycosylation of alpha-dystroglycan	PMID: 11592034
Cardiomyopathy, dilated, 1X	Fukuyama Congenital Muscular Dystrophy	MONDO:0009678	FKTN	Abnormal glycosylation of alpha-dystroglycan	PMID: 22275357
Fucosidosis	Fucosidosis	MONDO:0009254	FUCA1	Abnormal urinary glycans	PMID: 23676310
FUT8-CDG	Congenital Disorder Of Glycosylation With Defective Fucosylation	MONDO:0060720	FUT8	Abnormal N-glycans	PMID: 29304374
Severe congenital neutropenia type 4	Autosomal Recessive Severe Congenital Neutropenia Due To G6Pc3 Deficiency	MONDO:0012930	G6PC3	Abnormal O-glycans and N-glycans	PMID: 21385794
Glycogen storage disease Ib and Ic	Glycogen storage disease due to glucose-6-phosphatase deficiency type IB	MONDO:0009288	G6PT1	Abnormal N-glycans	PMID: 21385794
Pompe disease	Glycogen Storage Disease Due To Acid Maltase Deficiency, Late-Onset	MONDO:0018485	GAA	Abnormal urinary glycans	PMID: 23676310
Krabbe disease	Krabbe disease	MONDO:0009499	GALC	Abnormal glycolipids metabolism	PMID: 28168127
Morquio syndrome A	Morquio syndrome C	MONDO:0009647	GALNS	Abnormal chondroitin sulfate	PMID: 23958290
GALNT3-CDG	Hyperphosphatemic familial tumoral calcinosis	MONDO:0008897	GALNT3	Abnormal O-glycans	PMID: 15133511
GANAB-CDG	Polycystic kidney disease 3	MONDO:0010916	GANAB	Abnormal urinary glycans	PMID: 23676310
Gaucher disease, type I	Gaucher disease type I	MONDO:0009265	GBA	Abnormal urinary glycans	PMID: 23676310
Myasthenia, congenital, with tubular aggregates 1	Congenital myasthenic syndrome with tubular aggregates	MONDO:0000182	GFPT1	Decrease O-GlcNAcylation	PMID: 21310273
Fabry disease	Fabry disease	MONDO:0010526	GLA	Accumulation of glycolipids	PMID: 21290697
GM1-gangliosidosis (type I, II and III) - Morquio syndrome B	GM1 gangliosidosis type 1	MONDO:0009260	GLB1	Abnormal urinary glycans	PMID: 23676310
Tay-Sachs disease	Tay-Sachs disease AB variant	MONDO:0010099	GM2A	Abnormal urinary glycans	PMID: 23676310
GMPPA-CDG	Alacrima, Achalasia, And Mental Retardation Syndrome	MONDO:0014219	GMPPA	Abnormal GDP-Mannose levels in lymphoblasts	PMID: 24035193
Muscular dystrophy-dystroglycanopathy (congenital with brain and eye anomalies), type A14	Muscular Dystrophy-Dystroglycanopathy (Congenital With Brain And Eye Anomalies), Type A14	MONDO:0014140	GMPPB	Abnormal alpha-dystroglycan glycosylation	PMID: 27147698
Hereditary inclusion body myopathy type 2, Nonaka myopathy	Hereditary Inclusion Body Myopathy Type 4	MONDO:0011603	GNE	Increased plasma levels of glycosphingolipids	PMID: 24136589
Mucolipidosis II (alpha/beta)	Inclusion-Cell Disease	MONDO:0009650	GNPTAB	Abnormal urinary glycans	PMID: 23676310
Sanfilippo syndrome D	Sanfilippo Syndrome Type D	MONDO:0009658	GNS	Accumulation of dermatan sulfate	PMID: 21193389
Glycosylphosphatidylinositol biosynthesis defect 15	Glycosylphosphatidylinositol Biosynthesis Defect 15	MONDO:0060627	GPAA1	Decreased GPI-anchored proteins at cell-surface in leukocytes	PMID: 29100095
Mucopolysaccharidosis VII	Mucopolysaccharidosis Type 7	MONDO:0009662	GUSB	Abnormal urinary glycans	PMID: 19224584
GM2-gangliosidosis, AB variant	Tay-Sachs disease AB variant	MONDO:0010099	HEXA	Abnormal urinary glycans	PMID: 23676310
Sandhoff disease	Sandhoff disease	MONDO:0010006	HEXB	Abnormal urinary glycans	PMID: 23676310
Sanfilippo syndrome C	Sanfilippo syndrome type C	MONDO:0009657	HGSNAT	Abnormal heparan sulfate	PMID: 23958290
Mucopolysaccharidosis II	Mucopolysaccharidosis type 2	MONDO:0010674	IDS	Abnormal urinary glycans	PMID: 19748810
Hurler syndrome	Hurler syndrome	MONDO:0011758	IDUA	Abnormal urinary glycans	PMID: 19748810
ISPD-CDG	Muscular Dystrophy-Dystroglycanopathy (Congenital With Brain And Eye Anomalies), Type A, 7	MONDO:0013835	ISPD	Abnormal glycosylation of alpha-dystroglycan	PMID: 22522421
Neutropenia	Autosomal Recessive Severe Congenital Neutropenia Due To Jagn1 Deficiency	MONDO:0014456	JAGN1	Abnormal N-glycans	PMID: 25129144
LARGE-CDG (congenital muscular dystrophy spectrum)	Muscular Dystrophy-Dystroglycanopathy Type B6	MONDO:0012138	LARGE1	Abnormal alpha-dystroglycan glycosylation	PMID: 12966029
LFNG-CDG	Spondylocostal Dysostosis 3, Autosomal Recessive	MONDO:0012349	LFNG	Decrease enzymatic activit of fucose-specific β 1,3 N-acetylglucosaminyltransferase	PMID: 16385447
MAGT1–CDG	X-linked immunodeficiency with magnesium defect, Epstein-Barr virus infection and neoplasia	MONDO:0010455	MAGT1	Abnormal N-glycans	PMID: 31036665
Mental retardation, autosomal recessive 15	Intellectual Disability, Autosomal Recessive 15	MONDO:0013624	MAN1B1	Abnormal N-glycans	PMID: 24348268
Alpha-mannosidosis	Alpha-Mannosidosis	MONDO:0009561	MAN2B1	Abnormal urinary glycans	PMID: 21504867
Beta-mannosidosis	Beta-Mannosidosis	MONDO:0009562	MANBA	Abnormal urinary glycans	PMID: 21504867
MGAT2-CDG	MGAT2-CDG	MONDO:0008908	MGAT2	Abnormal N-glycans	PMID: 21273509
GCS1-CDG	MOGS-CDG	MONDO:0011629	MOGS	Abnormal N-glycans on immunoglobulins	PMID: 24716661
MPDU1-CDG	MPDU1-CDG	MONDO:0012211	MPDU1	Abnormal N-glycans	PMID: 11733556
MPI-CDG	MPI-CDG	MONDO:0011257	MPI	Hypoglycosylation of serum proteins	PMID: 9525984
Schindler disease, type I	Alpha-N-Acetylgalactosaminidase Deficiency Type 1	MONDO:0012221	NAGA	Abnormal urinary glycans	PMID: 21504867
Sanfilippo syndrome B	Sanfilippo Syndrome Type B	MONDO:0009656	NAGLU	Abnormal urinary glycans	PMID: 21504867
NANS-CDG	Spondyloepimetaphyseal Dysplasia, Genevieve Type	MONDO:0012495	NANS	Abnormal urinary glycans	PMID: 27213289
Sialidosis	Sialidosis	MONDO:0017734	NEU1	Abnormal urinary glycans	PMID: 23676310
Congenital disorder of deglycosylation (CDDG)	NGLY1-deficiency	MONDO:0014109	NGLY1	Abnormal urinary glycans	PMID: 29550355
Niemann-Pick disease, type C1	Niemann-Pick disease, type C1	MONDO:0009757	NPC1	Abnormal glycolipids metabolism	PMID: 23733943
Niemann-Pick disease, type C2	Niemann-Pick disease, type C2	MONDO:0011873	NPC2	Abnormal glycolipids metabolism	PMID: 23733943
NUS1-CDG	Congenital Disorder Of Glycosylation, Type Iaa; Cdg1Aa	MONDO:0014904	NUS1	Abnormal N-glycans	PMID: 21572394
Mental retardation, X-linked 106; MRX106	Intellectual Disability, X-Linked 106	MONDO:0030907	OGT	Reduced N-Acetylglucosamine transferase and O-GlcNAcase level	PMID: 28584052
Brachyolmia type 4 with mild epiphyseal and metaphyseal changes; BCYM4	Spondyloepimetaphyseal Dysplasia, Pakistani Type	MONDO:0013019	PAPSS2	Abnormal glycosaminoglycans	PMID: 9771708
PGAP1-CDG	Intellectual Disability, Autosomal Recessive 42	MONDO:0014348	PGAP1	Abnormal GPI-anchor proteins	PMID: 24784135
Hyperphosphatasia with mental retardation syndrome 3; HPMRS3	Hyperphosphatasia With Intellectual Disability Syndrome 3	MONDO:0013628	PGAP2	Abnormal GPI-anchor proteins	PMID: 23561846
PGAP3-CDG	Hyperphosphatasia With Intellectual Disability Syndrome 4	MONDO:0014318	PGAP3	Abnormal GPI-anchor proteins	PMID: 24439110
Phosphoglucomutase deficiency type 1	PGM1-CDG	MONDO:0013968	PGM1	Abnormal N-glycans	PMID: 24589341
PGM3-CDG	PGM3-CDG	MONDO:0014353	PGM3	Abnormal N-glycans and O-glycans	PMID: 24589341
Paroxysmal nocturnal hemoglobinuria, somatic mutation	Paroxysmal Nocturnal Hemoglobinuria 1	MONDO:0010438	PIGA	Abnormal GPI-anchor proteins	PMID: 8500164
PIGC-CDG	Glycosylphosphatidylinositol Biosynthesis Defect 16	MONDO:0040500	PIGC	Abnormal GPI-anchor proteins	PMID: 27694521
PIGG-CDG	Intellectual Disability, Autosomal Recessive 53	MONDO:0014832	PIGG	N/A	PMID: 26996948
PIGH-CDG	Glycosylphosphatidylinositol Biosynthesis Defect 17	MONDO:0060724	PIGH	Abnormal GPI-anchor proteins	PMID: 29603516
PIGL-CDG	Chime Syndrome	MONDO:0010221	PIGL	Abnormal GPI-anchor proteins	PMID: 22444671
PIGM-CDG	Hypercoagulability Syndrome Due To Glycosylphosphatidylinositol Deficiency	MONDO:0012465	PIGM	Abnormal GPI-anchor proteins	PMID: 16767100
Multiple congenital anomalies- hypotonia-seizures syndrome 1	Multiple Congenital Anomalies- Hypotonia-Seizures Syndrome 1	MONDO:0013563	PIGN	Abnormal GPI-anchor proteins	PMID: 24253414
PIGO-CDG	Hyperphosphatasia With Intellectual Disability Syndrome 2	MONDO:0013882	PIGO	Abnormal GPI-anchor proteins	PMID: 22683086
PIGP-CDG	Epileptic Encephalopathy, Early Infantile, 55	MONDO:0033364	PIGP	Abnormal GPI-anchor proteins	PMID: 28334793
PIGQ-CDG	N/A	N/A	PIGQ	Abnormal GPI-anchor proteins	PMID: 24463883
PIGT-CDG	Paroxysmal Nocturnal Hemoglobinuria 2	MONDO:0014166	PIGT	Abnormal GPI-anchor proteins	PMID: 23636107
Hyperphosphatasia with mental retardation syndrome 1	Hyperphosphatasia With Intellectual Disability Syndrome 1	MONDO:0009398	PIGV	Abnormal GPI-anchor proteins	PMID: 22315194
PIGW-CDG	Hyperphosphatasia With Intellectual Disability Syndrome 5	MONDO:0014457	PIGW	Abnormal GPI-anchor proteins	PMID: 24367057
PIGY-CDG	Hyperphosphatasia With Intellectual Disability Syndrome 6; Hpmrs6	MONDO:0014780	PIGY	Abnormal GPI-anchor proteins	PMID: 26293662
Ehlers-Danlos syndrome, type VI	Ehlers-Danlos Syndrome, Kyphoscoliotic Type	MONDO:0016002	PLOD1	Putative abnormal collagen glycosylation	PMID: 22708567
Bruck syndrome 2	Bruck Syndrome 2	MONDO:0012217	PLOD2	Putative abnormal collagen glycosylation	PMID: 22708567
Lysyl hydroxylase 3 deficiency	Connective Tissue Disorder Due To Lysyl Hydroxylase-3 Deficiency	MONDO:0012892	PLOD3	Putative abnormal collagen glycosylation	PMID: 22708567
PMM2-CDG	PMM2-CDG	MONDO:0008907	PMM2	Abnormal N-glycans	PMID: 26430078
POFUT1-CDG	Dowling-Degos disease 2	MONDO:0014130	POFUT1	Abnormal O-glycosylation of Notch receptors	PMID: 30214079
POGLUT1-CDG	Dowling-Degos disease 4	MONDO:0014307	POGLUT1	Abnormal O-glycosylation of Notch receptors	PMID: 30214079
POMGNT1-CDG (cong. muscular dystrophy spectrum)	Congenital Muscular Dystrophy With Intellectual Disability And Severe Epilepsy	MONDO:0014023	POMGNT1	Abnormal alpha-dystroglycan glycosylation	PMID: 19539754
POMGNT2-CDG	Muscular Dystrophy-Dystroglycanopathy (Congenital With Brain And Eye Anomalies), Type A, 8	MONDO:0013904	POMGNT2	Abnormal alpha-dystroglycan glycosylation	PMID: 27066570
POMK-CDG	Limb-Girdle Muscular Dystrophy Due To Pomk Deficiency	MONDO:0014489	POMK	Abnormal alpha-dystroglycan glycosylation	PMID: 23519211
	Congenital Muscular Dystrophy With Intellectual Disability And Severe Epilepsy	MONDO:0014023	POMT1	Abnormal alpha-dystroglycan glycosylation	PMID: 12369018
POMT1/POMT2-CDG (congenital muscular dystrophy spectrum)	Congenital Muscular Dystrophy With Intellectual Disability And Severe Epilepsy	MONDO:0014023	POMT2	Abnormal alpha-dystroglycan glycosylation	PMID: 15894594
PRKCSH-CDG	Isolated Polycystic Liver Disease	MONDO:0008265	PRKCSH	N-glycan synthesis	PMID: 12529853
Gaucher disease, atypical, due to saposin C deficiency	Atypical Gaucher Disease Due To Saposin C Deficiency	MONDO:0012517	PSAP	Abnormal urinary glycans	PMID: 19267410
RFT1-CDG	RFT1-CDG	MONDO:0012783	RFT1	N-glycan synthesis	PMID: 18313027
TMEM5-CDG	Muscular dystrophy-dystroglycanopathy (congenital with brain and eye anomalies), type a, 10	MONDO:0014022	RXYLT1	Abnormal alpha-dystroglycan glycosylation	PMID: 23217329
Chylomicron retention disease	Chylomicron retention disease	MONDO:0009528	SAR1B	Abnormal apolipoprotein B48 glycosylation	PMID: 11677202
SEC23A-CDG	Craniolenticulosutural dysplasia	MONDO:0011911	SEC23A	Increase in trisialotransferrin	PMID: 27148587
SEC23B-CDG	Congenital dyserythropoietic anemia type II	MONDO:0009134	SEC23B	Membrane protein hypoglycosylation	PMID: 23935019
SEC63-CDG	Polycystic liver disease 2; PCLD2	MONDO:0014860	SEC63	N-glycan synthesis	PMID: 15133510
Sanfilippo syndrome A	Sanfilippo syndrome type A	MONDO:0009655	SGSH	Abnormal urinary glycans	PMID: 30023302
Glucose-Galactose Malabsorption	Glucose-Galactose Malabsorption	MONDO:0011731	SLC5A1	Glycosuria	PMID: 5438804
SLC10A7-CDG	SLC10A7-CDG	MONDO:0100068	SLC10A7	Abnormal N-glycans	PMID: 30082715
Achondrogenesis type IB	Achondrogenesis type IB	MONDO:0010966	SLC26A2	Abnormal glycosaminoglycans	PMID: 7977372
SLC35A1-CDG	SLC35A1-CDG	MONDO:0011342	SLC35A1	Abnormal N-glycans and O-glycans	PMID: 23873973
SLC35A2-CDG	SLC35A2-CDG	MONDO:0010478	SLC35A2	Abnormal N-glycans and O-glycans	PMID: 23561849
SLC35A3-CDG	Autism spectrum disorder - epilepsy - arthrogryposis syndrome	MONDO:0014248	SLC35A3	Abnormal N-glycans	PMID: 24031089
SLC35C1-CDG	Leukocyte adhesion deficiency type II	MONDO:0009953	SLC35C1	Abnormal N-glycans	PMID: 21273509
Schneckenbecken dysplasia	Schneckenbecken dysplasia	MONDO:0010013	SLC35D1	Abnormal glycosaminoglycans	PMID: 17952091
Glycogen storage disease type IB	Glycogen storage disease due to glucose-6-phosphatase deficiency type IB	MONDO:0009288	SLC37A4	Abnormal N-glycans and O-glycans	PMID: 21385794
SLC39A8-CDG	SLC39A8-CDG	MONDO:0014746	SLC39A8	Abnormal N-glycans	PMID: 26637979
SRD5A3-CDG	SRD5A3-CDG	MONDO:0012885	SRD5A3	Abnormal N-glycans	PMID: 20637498
SSR3-CDG	N/A	N/A	SSR3	N/A	Freeze
SSR4-CDG	SSR4-CDG	MONDO:0010490	SSR4	N-glycan synthesis	PMID: 24218363
Mental retardation, autosomal recessive 12	Intellectual disability, autosomal recessive 12	MONDO:0012612	ST3GAL3	Abnormal sialylation of proteins	PMID: 23252400
ST3GAL5-CDG	GM3 synthase deficiency	MONDO:0018274	ST3GAL5	Abnormal plasma glycosphingolipids	PMID: 15502825
STT3A-CDG	STT3A-CDG	MONDO:0014270	STT3A	Abnormal N-glycans	PMID: 23842455
STT3B-CDG	STT3B-CDG	MONDO:0014271	STT3B	Abnormal N-glycans	PMID: 23842455
Multiple sulfatase deficiency	Mucosulfatidosis	MONDO:0010088	SUMF1	Abnormal urinary glycans	PMID: 159821
TMEM165-CDG	TMEM165-CDG	MONDO:0013870	TMEM165	Abnormal N-glycans	PMID: 22683087
TMEM199-CDG	TMEM199-CDG	MONDO:0014790	TMEM199	Abnormal N-glycans and O-glycans	PMID: 26833330
TRAPPC11-CDG	Autosomal recessive limb-girdle muscular dystrophy type 2S	MONDO:0014144	TRAPPC11	Hypoglycosylation of LAMP1	PMID: 27707803
TRAPPC12-CDG	Early-onset progressive encephalopathy- hearing loss-pons hypoplasia-brain atrophy syndrome	MONDO:0044696	TRAPPC12	N/A	PMID: 27010055
TRAPPC6B-CDG	Neurodevelopmental disorder with microcephaly, epilepsy, and brain atrophy	MONDO:0060640	TRAPPC6B	N/A	PMID: 27010055
TRIP11-CDG	Achondrogenesis type IA	MONDO:0008701	TRIP11	N/A	PMID: 27010055
TUSC3-CDG	Intellectual disability, autosomal recessive 7	MONDO:0012615	TUSC3	N/A	PMID: 27010055
VPS13B-CDG	Cohen syndrome	MONDO:0008999	VPS13B	Accumulation of agalactosylated fucosylated serum proteins	PMID: 24334764
XYLT1-CDG	XYLT1-CDG	MONDO:0018273	XYLT1	Abnormal decorin glycosylation	PMID: 23982343
XYLT2-CDG	Spondylo-Ocular Syndrome	MONDO:0011604	XYLT2	Abnormal glycosaminoglycans	PMID: 26027496
