# Supplementary material for: Representing glycophenotypes: semantic unification of glycobiology resources for disease discovery
Source: Database (Oxford). 2019 Nov 18;2019:baz114. doi: 10.1093/database/baz114 (PMC6859258; doi:10.1093/database/baz114)
Supplement: Supplemental-Table2_baz114 [file supplemental-table2_baz114.xlsx]

## Sheet: Supplemental Table 2
HPO terms related to glycobiology terms, searched with Protégé*
Categories	HPO terms	HPO Identifiers
Abnormal glucose homeostasis	Abnormal glucose homeostasis	HP:0011014
	Abnormal blood glucose concentration	HP:0011015
	Hyperglycemia	HP:0003074
	Postprandial hyperglycemia	HP:0011998
	Hypoglycemia	HP:0001943
	Hypoglycemic seizures	HP:0002173
	Hypoketotic hypoglycemia	HP:0001985
	Ketotic hypoglycemia	HP:0012734
	Neonatal hypoglycemia	HP:0001998
	Nonketotic hypoglycemia	HP:0001958
	Reactive hypoglycemia	HP:0012051
	Recurrent hypoglycemia	HP:0001988
	Recurrent infantile hypoglycemia	HP:0004914
	Glucose intolerance	HP:0001952
	Diabetes mellitus	HP:0000819
	Diabetic ketoacidosis	HP:0001953
	Insulin-resistant diabetes mellitus	HP:0000831
	Insulin-resistant diabetes mellitus at puberty	HP:0000877
	Neonatal insulin-dependent diabetes mellitus	HP:0000857
	Transient neonatal diabetes mellitus	HP:0008255
	Maternal diabetes	HP:0009800
	Maturity-onset diabetes of the young	HP:0004904
	Type I diabetes mellitus	HP:0100651
	Type II diabetes mellitus	HP:0005978
	Insulin-dependent but ketosis-resistant diabetes	HP:0008205
	Impaired glucose tolerance	HP:0040270
	Abnormal oral glucose tolerance	HP:0004924
	Hyperinsulinemia	HP:0000842
	Fasting hyperinsulinemia	HP:0008283
	Hyperinsulinemic hypoglycemia	HP:0000825
	Impaired gluconeogenesis	HP:0005959
	Increased proinsulin:insulin ratio	HP:0031883
	Insulin insensitivity	HP:0008189
	Insulin resistance	HP:0000855
	Insulin-resistant diabetes mellitus	HP:0000831
	Insulin-resistant diabetes mellitus at puberty	HP:0000877
	Neonatal insulin-dependent diabetes mellitus	HP:0000857
	Transient neonatal diabetes mellitus	HP:0008255
Abnormal glycosylation (abnormality of glycolipid metabolism and abnormal protein glycosylation )	Abnormal glycosylation	HP:0012345
	Abnormality of glycolipid metabolism	HP:0010969
	Abnormality of glycosphingolipid metabolism	HP:0004343
	Abnormality of cerebrosidase metabolism	HP:0004344
	Absence of ganglioside GM3	HP:0410370
	Ganglioside accumulation	HP:0004345
	GM2-ganglioside accumulation	HP:0003495
	Increased globoside Gb3 level	HP:0410368
	Increased globoside Gb4 level	HP:0410366
	Abnormal protein glycosylation	HP:0012346
	Abnormal protein N-linked glycosylation	HP:0012347
	Abnormal complex N-glycan level	HP:0410351
	Decreased complex N-glycan level	HP:0410353
	Increased complex N-glycan level	HP:0410352
	Abnormal fucosylation of protein N-linked glycosylation	HP:0012352
	Decreased fucosylation of N-linked protein glycosylation	HP:0012353
	Increased fucosylation of N-linked protein glycosylation	HP:0012354
	Abnormal high-mannose N-glycan level	HP:0410356
	Decreased high-mannose N-glycan level	HP:0410358
	Increased high-mannose N-glycan level	HP:0410357
	Abnormal isoelectric focusing of serum transferrin	HP:0003160
	Type I transferrin isoform profile	HP:0003642
	Type II transferrin isoform profile	HP:0012301
	Abnormal mannosylation of N-linked protein glycosylation	HP:0012355
	Decreased mannosylation of N-linked protein glycosylation	HP:0012356
	Increased mannosylation of N-linked protein glycosylation	HP:0012357
	Abnormal sialylation of N-linked protein glycosylation	HP:0012349
	Decreased sialylated N-glycan level	HP:0410355
	Decreased sialylation of N-linked protein glycosylation	HP:0012350
	Increased sialylated N-glycan level	HP:0410354
	Increased sialylation of N-linked protein glycosylation	HP:0012351
	Decreased galactosylation of N-linked protein glycosylation	HP:0012348
	Abnormal protein O-linked glycosylation	HP:0012358
	Abnormal core 1 O-glycan level	HP:0410359
	Decreased core 1 O-glycan level	HP:0410361
	Increased core 1 O-glycan level	HP:0410360
	Abnormal fucosylation of O-linked protein glycosylation	HP:0012359
	Decreased fucosylation of O-linked protein glycosylation	HP:0012360
	Increased fucosylation of O-linked protein glycosylation	HP:0012361
	Shortened O-fucosylated glycan on properdin	HP:0410344
	Abnormal sialylation of O-linked protein glycosylation	HP:0012362
	Decreased monosialylated core 1 O-glycan level	HP:0410364
	Decreased sialylation of O-linked protein glycosylation	HP:0012363
	Increased disialylated core 1 O-glycan level	HP:0410365
	Increased monosialylated core 1 O-glycan level	HP:0410363
	Increased Tn-antigen level	HP:0410372
Abnormal glycosyltransferase activity	Decreased beta-glucocerebrosidase activity	HP:0003656
	Decreased glucosephosphate isomerase activity	HP:0003568
	Decreased glycosyltransferase O-Fucosylpeptide 3-Beta-N-Acetylglucosaminyltransferase activity	HP:0410349
	Reduced activity of N-acetylglucosaminyltransferase II	HP:0003655
Abnormal free glycans level	Abnormal circulating carbohydrate concentration	HP:0011013
	Abnormal circulating glycerol level	HP:0031795
	Decreased circulating glycerol level	HP:0031794
	Hyperglycerolemia	HP:0040302
	Abnormal circulating heparan sulfate level	HP:0410341
	Decreased circulating heparan sulfate level	HP:0410343
	Increased circulating heparan sulfate level	HP:0410342
	Abnormal circulating polysaccharide concentration	HP:0011012
	Abnormal circulating hyaluronic acid concentration	HP:0031210
	Abnormality of glycolysis	HP:0004366
	Increased serum pyruvate	HP:0003542
	Decreased level of 1,5 anhydroglucitol in serum	HP:0410050
	Elevated cancer Ag 19-9 level	HP:0032345
	Elevated circulating ribitol concentration	HP:0025550
	Hypergalactosemia	HP:0012024
	Increased level of D-threitol in plasma	HP:0410057
	Increased level of galactitol in plasma	HP:0410061
	Increased level of galactitol in red blood cells	HP:0410064
	Abnormal urine carbohydrate level	HP:0031979
	Decreased level of D-mannose in urine	HP:0410060
	Decreased level of erythritol in urine	HP:0410055
	Galactosuria	HP:0012023
	Increased level of D-threitol in urine	HP:0410059
	Increased level of galactitol in urine	HP:0410062
	Increased level of L-fucose in urine	HP:0410067
	Increased level of ribitol in urine	HP:0410070
	Increased level of ribose in urine	HP:0410072
	Increased level of xylitol in urine	HP:0410074
	Increased urinary glycerol	HP:0040301
	Increased urinary sedoheptulose	HP:0025157
	Oligosacchariduria	HP:0010471
	Increased urinary disaccharide excretion	HP:0012066
	Increased urinary fucosylated oligosaccharide	HP:0410350
	Increased urinary galactosylated oligosaccharide	HP:0410346
	Increased urinary high-mannose-type oligosaccharide	HP:0410347
	Increased urinary multiantennary sialylated oligosaccharide	HP:0410348
	Increased urinary polyhexose	HP:0410345
	Urinary excretion of sialylated oligosaccharides	HP:0012061
